# Supplementary material
Source: publisher site journal article supplement (https://www.dovepress.com/article/487163)
Supplement: Supplementary file 1 [file get_supplementary_file.php]

**Supplementary Table 1. Madagascar geographic and DA therapy coverage in 2023**

| **Regions** | **Districts** | **Execution unit** | | **Therapeutic coverage reported (%)** | | **Geographic coverage reported** |
| --- | --- | --- | --- | --- | --- | --- |
| **No. of villages** | **Population per village** | **Number of individuals who took medication** | **% total population** | **% Total number of villages treated** |
|  |
| Diana | Antsiranana 1 | 25 | 151967 | 100433 | 66.09 | 100 |  |
| Antsiranana 2 | 162 | 153620 | 117595 | 76.55 | 100 |  |
| Ambilobe | 178 | 343424 | 230158 | 67.02 | 100 |  |
| Ambanja | 188 | 280278 | 228130 | 81.39 | 100 |  |
| Sofia | Antsohihy | 170 | 201989 | 145567 | 72.07 | 100 |  |
| Mandritsara | 245 | 267851 | 171975 | 64.21 | 100 |  |
| Befandriana | 303 | 309087 | 242434 | 78.44 | 100 |  |
| Analalava | 206 | 161615 | 141482 | 87.54 | 100 |  |
| Sava | Sambava | 347 | 480095 | 319192 | 66.49 | 100 |  |
| Antalaha | 223 | 315336 | 229083 | 72.65 | 100 |  |
| Andapa | 156 | 255024 | 181525 | 71.18 | 100 |  |
| Vohemar | 153 | 305919 | 209891 | 68.61 | 100 |  |
| Analanjirofo | Soanierana Ivongo | 106 | 165290 | 129239 | 78.19 | 100 |  |
| Mananara | 218 | 324283 | 221845 | 68.41 | 100 |  |
| Maroantsetra | 167 | 297776 | 234388 | 78.71 | 100 |  |
| Matsiatra Ambony | Ambalavao | 165 | 347087 | 270485 | 77.93 | 100 |  |
| Ambohimahasoa | 165 | 312697 | 238435 | 76.25 | 100 |  |
| Fianarantsoa I | 50 | 222747 | 144862 | 65.03 | 100 |  |
| Ikalamavony | 60 | 148965 | 115168 | 77.31 | 100 |  |
| Atsinanana | Atanambao Manampotsy | 59 | 71908 | 48868 | 67.96 | 100 |  |
| Marolambo | 172 | 197641 | 137329 | 69.48 | 100 |  |
| Toamasina I | 136 | 391570 | 281594 | 71.91 | 100 |  |
| Toamasina Ii | 172 | 314506 | 242845 | 77.21 | 100 |  |
| Vatovavy 7 Vinany | Ifanadina | 196 | 365820 | 328287 | 89.74 | 100 |  |
| Ikongo | 179 | 256770 | 190917 | 74.35 | 100 |  |
| Nosy Varika | 270 | 334818 | 247438 | 73.90 | 100 |  |
| Sofia | Bealanana | 190 | 218373 | 153585 | 70.33 | 100 |  |
| Betsiboka | Kandreho | 40 | 32362 | 23733 | 73.34 | 100 |  |
| Maevatanana | 193 | 259432 | 200269 | 77.20 | 100 |  |
| Tsaratanana Nord Et Sud | 170 | 232491 | 205977 | 88.60 | 100 |  |
| Amoron Mania | Ambatofinandrahana | 105 | 257964 | 180258 | 69.88 | 100 |  |
| Ambositra | 292 | 346556 | 235410 | 67.93 | 100 |  |
| Fandriana | 302 | 252244 | 162476 | 64.41 | 100 |  |
| Boeny | Ambato Boeni | 143 | 317199 | 212437 | 66.97 | 100 |  |
| Mahajanga I | 26 | 286858 | 231586 | 80.73 | 100 |  |
| Marovoay | 160 | 229353 | 159596 | 69.59 | 100 |  |
| Alaotra Mangoro | Amparafaravola | 204 | 363078 | 273047 | 75.20 | 100 |  |
| Ambatondrazaka | 223 | 420232 | 320555 | 76.28 | 100 |  |
| Andilamena | 77 | 122502 | 80199 | 65.47 | 100 |  |
| Anosibe An'ala | 96 | 127041 | 82536 | 64.97 | 100 |  |
| Atsimo Atsinanana | Vondrozo | 142 | 196179 | 133841 | 68.22 | 98 |  |
| Farafangana | 312 | 492751 | 374475 | 76.00 | 100 |  |
| Vanigadrano | 304 | 408090 | 335276 | 82.16 | 100 |  |
| Befotaka | 50 | 65745 | 48713 | 74.09 | 100 |  |
| Midongy | 52 | 56653 | 40039 | 70.67 | 100 |  |
| Androy | Ambovombe | 844 | 447175 | 330992 | 74.02 | 100 |  |
| Tsihombe | 507 | 176079 | 134380 | 76.32 | 100 |  |
| Beloha | 405 | 187210 | 149076 | 79.63 | 100 |  |
| Ihorombe | Iakora | 58 | 100047 | 61331 | 61.30 | 100 |  |
| Ihosy | 201 | 303621 | 259161 | 85.36 | 100 |  |
| Ivohibe | 45 | 83449 | 63360 | 75.93 | 100 |  |
| Anosy | Tolagniaro | 263 | 404594 | 309410 | 76.47 | 100 |  |
| Betsoka | 232 | 248409 | 197038 | 79.32 | 100 |  |
| Analamanga | Ambohidratrimo | 326 | 1020367 | 795688 | 77.98 | 100 |  |
| Itasy | Miarinarivo | 167 | 342531 | 255334 | 74.54 | 100 |  |
| Arivonimamo | 286 | 401893 | 304094 | 75.67 | 100 |  |
| Soavinandriana | 136 | 291956 | 241193 | 82.61 | 100 |  |
| Bongolava | Tsiromandidy | 215 | 590607 | 411074 | 69.60 | 100 |  |
| Fenoarivobe | 102 | 218691 | 153671 | 70.27 | 100 |  |
| **TOTAL** | **59** | **11,339** | **16,479,815** | **12,268,975** | **74.45** | **99.97** |  |

**Supplementary Table 2. Madagascar geographic and IDA therapy coverage in 2023**

| **Regions** | **Districts** | **Execution unit** | | **Therapeutic coverage reported (%)** | | **Geographic coverage reported** |
| --- | --- | --- | --- | --- | --- | --- |
| **No. of FKT** | **Population FKT** | **Number of individuals who took medication** | **% total population** | **% total number of villages treated** |
|
| Atsinanana | Brickaville | 182 | 245486 | 195993 | 79.84 | 100 |
| Mahanoro | 203 | 334366 | 264000 | 78.96 | 100 |
| Vatomandry | 176 | 200322 | 160069 | 79.91 | 100 |
| Sofia | Mampikony | 182 | 223712 | 196137 | 87.67 | 100 |
| Port-Berge(Boriziny-Vaovao) | 276 | 269300 | 215773 | 80.12 | 100 |
| Atsimo Andrefana | Ankazoabo | 107 | 86720 | 65980 | 76.08 | 100 |
| Betioky Atsimo | 214 | 221322 | 174977 | 79.06 | 100 |
| Morombe | 71 | 263683 | 211055 | 80.04 | 100 |
| Sakaraha | 126 | 188283 | 153278 | 81.41 | 100 |
| Boeny | Mahajanga Ii | 75 | 114404 | 92821 | 81.13 | 100 |
| Mitsinjo | 58 | 97176 | 66366 | 68.29 | 100 |
| Soalala | 59 | 50415 | 38944 | 77.25 | 100 |
| Analanjirofo | Fenerive Est | 211 | 326840 | 244890 | 74.93 | 100 |
| Vavatenina | 150 | 225326 | 178633 | 79.28 | 100 |
| Alaotra Mangoro | Moramanga | 190 | 396674 | 328360 | 82.78 | 100 |
| Melaky | Ambatomainty | 44 | 55594 | 46312 | 83.30 | 100 |
| Antsalova | 59 | 70175 | 53224 | 75.84 | 100 |
| Besalampy | 74 | 68052 | 48420 | 71.15 | 100 |
| Maintirano | 133 | 153515 | 107085 | 69.76 | 100 |
| Morafenobe | 57 | 41077 | 33694 | 82.03 | 100 |
| Menabe | Mahabo | 141 | 176044 | 131459 | 74.67 | 100 |
| Miandrivazo | 143 | 177463 | 139374 | 78.54 | 100 |
| Anosy | Amboasary Atsimo | 571 | 310661 | 255308 | 82.18 | 100 |
| Analamanga | Tana Nord | 214 | 559632 | 459085 | 82.03 | 100 |
| **TOTAL** | **24** | **3,716** | **4,856,242** | 3,861,237 | **79.51** | **100** |

**Supplementary Table 3. Lymphoedema and Hydrocele Cases Recorded in 2023 in the 83 Endemic Districts of Madagascar**

| **Regions** | **Districts** | **Lymphoedema**  **cases** | **Hydrocele**  **cases** |
| --- | --- | --- | --- |
| Alaotra mangoro | Ambatondrazaka | 135 | 27 |
| Amparafaravola | 123 | 17 |
| Andilamena | 112 | 35 |
| Anosibe an ala | 116 | 220 |
| Moramanga | 11 | 13 |
| Amoron mania | Ambatofinandrahana | 9 | 9 |
| Ambositra | 56 | 72 |
| Fandriana | 8 | 3 |
| Analamanga | Antananarivo avaradrano | 2 | 0 |
| Analanjirofo | Maroantsetra | 55 | 75 |
| Vavatenina | 326 | 405 |
| Androy | Ambovombe androy | 5 | 6 |
| Beloha | 6 | 5 |
| Tsihombe | 4 | 0 |
| Anosy | Amboasary atsimo | 54 | 2 |
| Betsoka | 0 | 0 |
| Tolagniaro | 288 | 203 |
| Atsimo andrefana | Ankazoabo atsimo | 1 | 0 |
| Benenitra | 0 | 0 |
| Betioky atsimo | 29 | 3 |
| Morombe | 4 | 7 |
| Sakaraha | 6 | 2 |
| Atsimo atsinanana | Befotaka | 130 | 71 |
| Farafangana | 842 | 784 |
| Midongy atsimo | 106 | 22 |
| Vanigadrano | 571 | 462 |
| Vondrozo | 347 | 273 |
| Atsinanana | Atanambao manampotsy | 238 | 257 |
| Mahanoro | 516 | 538 |
| Marolambo | 330 | 426 |
| Toamasina i | 229 | 125 |
| Toamasina ii | 876 | 1152 |
| Vatomandry | 247 | 373 |
| Vohibinany | 242 | 391 |
| Betsiboka | Kandreho | 14 | 19 |
| Maevatanana | 23 | 37 |
| Tsaratanana nord | 36 | 11 |
| Boeny | Ambato boina | 23 | 20 |
| Mahajanga i | 0 | 0 |
| Mahajanga ii | 22 | 26 |
| Marovoay | 37 | 50 |
| Mitsinjo | 10 | 9 |
| Soalala | 5 | 39 |
| Bongolava | Fenoarivobe | 1 | 0 |
| Tsiroanomanoidy | 0 | 0 |
| Diana | Ambanja | 33 | 59 |
| Ambilobe | 15 | 22 |
| Antsiranana i | 3 | 1 |
| Antsiranana ii | 16 | 35 |
| Nosy be | 0 | 0 |
| Fitovinany | Ikongo | 617 | 514 |
| Manakara atsimo | 2922 | 1659 |
| Ihorombe | Iakora | 19 | 1 |
| Ihosy | 31 | 2 |
| Ivohibe | 9 | 5 |
| Itasy | Arivonimamo | 0 | 0 |
| Miarinarivo | 0 | 2 |
| Soavinandriana | 0 | 1 |
| Matsiatra ambony | Ambalavao | 171 | 95 |
| Ambohimahasoa | 133 | 20 |
| Fianarantsoa i | 17 | 8 |
| Ikalamavony | 112 | 39 |
| Melaky | Ambatomainty | 7 | 22 |
| Antsalova | 1 | 8 |
| Besalampy | 10 | 41 |
| Maintirano | 31 | 55 |
| Morafenobe | 6 | 42 |
| Menabe | Mahabo | 21 | 13 |
| Miandrivazo | 9 | 25 |
| Sava | Andapa | 97 | 48 |
| Antalaha | 159 | 123 |
| Sambava | 126 | 42 |
| Vohemar | 135 | 105 |
| Sofia | Analalava | 89 | 201 |
| Antsohihy | 95 | 235 |
| Bealanana | 22 | 11 |
| Befandriana avaratra | 138 | 237 |
| Boriziny-vaovao (port-berge) | 232 | 142 |
| Mampikony | 43 | 116 |
| Mandritsara | 127 | 269 |
| Vatovavy | Ifanadiana | 525 | 462 |
| Ikongo | 1184 | 894 |
| Nosy varika | 597 | 649 |
